# Supplementary material
Source: PubMed Central journal article supplement (PMC10413720)
Supplement: NIHMS1916803-supplement-Supplement_-_Spanish_Translation.pdf [file NIHMS1916803-supplement-Supplement_-_Spanish_Translation.pdf]

**Supplementary information**

---

**Leave no one behind: ensuring access to  
COVID-19 vaccines for refugee and displaced  
populations**

---

In the format provided by the  
authors and unedited

**Que nadie se quede atrás: garantizando el acceso a las vacunas contra la COVID-19 para las poblaciones refugiadas y desplazadas**

Monette Zard<sup>1\*</sup>, MA; Ling San Lau<sup>1</sup>, MBBS; Diana M. Bowser<sup>2</sup>, ScD; Fouad M. Fouad<sup>3</sup>, MD; Diego I. Lucumí<sup>4</sup>, PhD; Goleen Samari<sup>1</sup>, PhD; Arturo Harker<sup>4</sup>, PhD; Donald S. Shepard<sup>2</sup>, PhD; Wu Zeng<sup>5</sup>, PhD; Rachel T. Moresky<sup>1,6</sup>, MD; Mhd Nour Audi<sup>1</sup>, MD; Claire M. Greene<sup>1</sup>, PhD; S. Patrick Kachur<sup>1</sup>, MD.

<sup>1</sup>Programa sobre Migración Forzada y Salud, Departamento Heilbrunn de Salud de la Población y la Familia, Escuela Mailman de Salud Pública, Columbia University, Nueva York, EE. UU.

<sup>2</sup>Escuela Heller de Política y Gestión Social, Brandeis University, Waltham, Massachussets, EE. UU.

<sup>3</sup>Facultad de Ciencias de la Salud, American University of Beirut, Beirut, Líbano

<sup>4</sup>Escuela de Gobierno, Universidad de los Andes, Bogotá, Colombia

<sup>5</sup>Departamento de Salud Internacional, Escuela de Enfermería y Ciencias de la Salud, Georgetown University, Washington D.C., EE. UU.

<sup>6</sup>Departamento de Medicina de Emergencia, Irving Medical Center de University of Columbia, Nueva York, EE. UU.

\*Autor para correspondencia:

Monette Zard

Profesora Asociada Allan Rosenfield de Migración Forzada y Salud

Directora del Programa sobre Migración Forzada y Salud

Departamento Heilbrunn de Salud de la Población y la Familia

Escuela de Salud Pública Mailman en Columbia University

Teléfono: 914-413-5898

Correo electrónico: mz2621@cumc.columbia.edu

## **Subtítulo:**

Garantizar el acceso a la vacuna contra la COVID-19 para las poblaciones refugiadas y desplazadas, y abordar las desigualdades sanitarias, es fundamental para una respuesta eficaz a la pandemia.

## **Cuerpo:**

El creciente número de víctimas de la pandemia y la preocupación por las variantes emergentes de SARS-CoV-2 han puesto de relieve la urgencia de un despliegue rápido, equitativo e inclusivo de la vacuna contra la COVID-19. Sin embargo, a medida que el mundo se enfrenta a los problemas de abastecimiento y al acceso desigual a las vacunas a escala local y mundial, los grupos marginados, en particular los refugiados, los desplazados internos y los apátridas, se enfrentarán a una carga extra en el acceso, incluso dentro de países que se encuentran marginados en la escena mundial. En todo el mundo, más del 80 % de los refugiados y casi todos los desplazados internos son acogidos por países de ingresos medios y bajos (PIMB)<sup>1</sup>; países que se encuentran al final de la cola para recibir dosis de la vacuna contra la COVID-19 y donde la distribución de las vacunas pondrá de manifiesto las fisuras de sistemas de salud sobrecargados y débiles. En estos entornos, los refugiados y otras poblaciones desplazadas se enfrentan a obstáculos adicionales para el acceso a las vacunas que deben ser reconocidos y superados, tanto en el diseño de la política pública como en la práctica. En entornos frágiles con una gobernanza débil, la competencia por las escasas vacunas contra la COVID-19 puede aumentar las tensiones y exacerbar los conflictos, mientras que el acceso desigual plantea la posibilidad de que las poblaciones se desplacen en un intento por acceder a las vacunas que no están disponibles en su país o región. Es necesario adoptar un enfoque coordinado, integral y global de acceso a las vacunas, en contraposición al discurso altamente politizado y nacionalista que ha caracterizado la respuesta a la pandemia hasta ahora. La ciencia y la necesidad, y no la riqueza, nacionalidad o el estatus legal, deben guiar la asignación y la priorización de las vacunas.

*Garantizar el acceso de las poblaciones refugiadas y desplazadas en un contexto de escasez de vacunas*

A pesar de las llamadas a la cooperación global y de la declaración de la directora ejecutiva de UNICEF, Henrietta Fore, y el director general de la OMS, el Dr. Tedros Adhanom Ghebreyesus, de que “en la carrera por la vacuna contra la COVID-19, o ganamos juntos o perdemos juntos”,<sup>2</sup> la asignación y distribución de las vacunas no ha sido ni equitativa ni inclusiva. Más de tres cuartas partes de los 128 millones de vacunas dispensadas al 10 de febrero de 2021 han sido administradas en 10 países que representan el 60 % del producto interno bruto (PIB) mundial.<sup>2</sup> En la carrera por conseguir las escasas dosis de la vacuna, los países de altos ingresos han aprovechado los Acuerdos de Compra Anticipada (*Advance Purchase Agreements - APAs*) para imponerse sobre los países con menos recursos.<sup>3</sup> El Mecanismo Mundial de Vacunación COVAX, una iniciativa conjunta de las Naciones Unidas liderada por Gavi, tiene como objetivo extender la cobertura de la vacuna contra el SARS-CoV-2 en PIMB e incluye un pequeño “colchón humanitario” (cerca del 5 % del total de dosis disponibles) para uso humanitario, incluida la vacunación de los refugiados.<sup>4</sup> Sin embargo, esto es claramente insuficiente: los dos mil millones de dosis de vacunas previstas para

finales de 2021 sólo cubrirán, como máximo, al 20% de la población de los países participantes.<sup>5</sup> Las proyecciones actuales indican que los países más pobres no podrán vacunar masivamente a su población hasta 2023.<sup>6</sup>

En este contexto de desigualdad global, los refugiados y las poblaciones desplazadas se enfrentan a barreras adicionales para acceder a las vacunas y los servicios de salud en general en los países donde residen. Hasta ahora, sólo 54 países han incluido explícitamente a los refugiados y a las poblaciones desplazadas en sus planes de distribución de vacunas<sup>7</sup>. Los problemas de costos (tanto los costos directos de la atención en salud como los costos propios asociados a la búsqueda de atención), la discriminación y el estigma, así como la desconfianza en las autoridades y los temores relacionados con la revelación de la condición migratoria, pueden disuadir a las personas desplazadas de buscar la vacunación, incluso cuando son elegibles.<sup>8</sup> En muchos países, la falta de datos fiables sobre las poblaciones desplazadas complicará la identificación de las personas que reúnen los requisitos para recibir una vacuna, mientras que la movilidad y los desplazamientos repetidos suponen un reto para la continuidad de la atención, incluido el seguimiento de la segunda dosis de la vacuna,<sup>9</sup> cuando es necesaria. La información fiable y oportuna sobre las vacunas, incluida su eficacia y seguridad, y sobre cómo acceder a ellas, es esencial para promover la aceptación y confianza en las vacunas. Sin embargo, en muchos contextos de desplazamiento, como los asentamientos de refugiados Rohingya en Cox's Bazar (Bangladés), el acceso a la información y las telecomunicaciones suele estar restringido.

Las poblaciones desplazadas suelen ser atendidas por sistemas de salud débiles, fragmentados y dependientes de donaciones, que tienen que hacer frente a una multitud de necesidades sanitarias, muchas de las cuales se han visto complicadas o exacerbadas por la pandemia de la COVID-19.<sup>8</sup> Entre ellas se encuentran brotes de enfermedades transmisibles, como los brotes simultáneos de sarampión y ébola que azotan a la República Democrática del Congo y Guinea, el VIH, la tuberculosis, la malaria, la desnutrición, los programas de inmunización infantil rutinarios, la salud sexual y reproductiva, la salud mental y otras enfermedades crónicas.<sup>8,10-12</sup> La debilidad de la infraestructura sanitaria, incluida la limitada capacidad de garantizar la cadena de frío, la escasez de trabajadores de la salud capacitados<sup>10</sup> y la fragmentación de los sistemas de información en salud<sup>10</sup> plantean problemas crónicos, particularmente en las zonas remotas donde a menudo se localizan los campamentos de refugiados. Estas dificultades complicarán cualquier despliegue futuro de vacunas. En contextos de conflicto, la violencia, la inseguridad y los ataques contra las instalaciones y el personal sanitario representan retos fundamentales.<sup>13</sup>

Reconociendo que un enfoque limitado en los programas de vacunación de emergencia puede desestabilizar los frágiles sistemas de salud y perturbar otros servicios esenciales de salud, los responsables de las políticas y donantes deben aprovechar la oportunidad de la pandemia para fortalecer los sistemas de salud de manera más amplia y sostenible para responder mejor a los desafíos de la COVID-19, al tiempo que se abordan las necesidades de salud integrales de los refugiados y las poblaciones de acogida. Un estudio realizado en seis PIMB mostró que la introducción de nuevas vacunas mejoró la formación de personal y la vigilancia de enfermedades, y aumentó la financiación local y externa. Además, la introducción de nuevas vacunas fortaleció la colaboración entre varias agencias nacionales.<sup>14</sup>

### *El estatus legal no debe determinar el acceso a las vacunas*

En medio de un intenso nacionalismo, los gobiernos pueden ceder a la presión para priorizar el acceso a la vacuna para sus propios ciudadanos, incluso cuando esto va en contra de los objetivos

de salud pública y puede prolongar la pandemia. Las tensiones generalizadas<sup>15</sup> sobre la prioridad de las vacunas se magnifican en entornos frágiles en los que la introducción de las vacunas contra la COVID-19 se sumará a una mezcla ya volátil de gobernanza débil, corrupción y luchas intracomunitarias, lo que puede además avivar la preocupación por incentivar más movimientos transfronterizos. En el Líbano, que acoge a más de 1,7 millones de refugiados sirios y palestinos, el gobierno se ha comprometido en principio a un acceso equitativo a las vacunas para todos, pero miembros del propio partido del presidente, molestos por la posibilidad de que los refugiados accedan a las vacunas, han promovido tendencias xenófobas en las redes sociales.<sup>16</sup> En Siria, donde la pandemia se ha cobrado un número considerable de víctimas, las organizaciones de defensa de los derechos humanos han expresado su preocupación por la posibilidad de que el gobierno continúe con su patrón de favorecer a los aliados y castigar a los enemigos a la hora de distribuir las dosis de vacunas.<sup>17</sup> Es probable que estas tendencias se reproduzcan en otras zonas de conflicto en el mundo, con el peligro potencial de desencadenar nuevas fuentes de conflicto.<sup>18</sup> A finales de 2020, el presidente de Colombia, Iván Duque, que actualmente acoge a 1,7 millones de migrantes venezolanos (la mayoría de los cuales están indocumentados), desató la polémica cuando justificó que se excluyera en gran medida a esta población del programa nacional de vacunación contra la COVID-19 para evitar “una estampida” sobre el maltrecho sistema de salud venezolano.<sup>19</sup> En un avance optimista, en febrero de 2021 Colombia anunció un programa de regularización que otorgará un estado de protección temporal a casi un millón de venezolanos, lo que les permitirá acceder al sistema nacional de salud y, por extensión, a las vacunas contra la COVID-19.<sup>20</sup> No obstante, el estatus legal no debería influir en las decisiones sobre el acceso a las vacunas, e imponer la regularización como vía para la vacunación retrasará de forma inaceptable los efectos protectores para los migrantes y refugiados, especialmente en los grupos de mayor riesgo.

Aunque la complejidad y la escala del despliegue de la vacuna contra la COVID-19 son formidables, los responsables de las políticas públicas y los trabajadores de salud pública pueden extraer lecciones de la experiencia en la gestión de enfermedades como el VIH y la tuberculosis entre las poblaciones móviles, así como de anteriores campañas de vacunación a gran escala en contextos humanitarios. El programa mundial de erradicación de la polio ha llevado al mundo al borde de la erradicación de la polio, gracias a los intensos esfuerzos por vacunar a las poblaciones móviles, aquellas afectadas por conflictos, y otras poblaciones marginadas. Entre las lecciones valiosas para aumentar la cobertura de las vacunas entre estas poblaciones se incluye el fortalecimiento de las actividades de vacunación y vigilancia en los cruces fronterizos, los centros de tránsito y otros puntos de acceso, como los campos de refugiados, los asentamientos de desplazados internos, los mercados y las reuniones religiosas; la integración de las actividades de vacunación con las actividades humanitarias esenciales, incluida la distribución de alimentos y medicamentos y las evaluaciones nutricionales; el uso de la tecnología de los sistemas de información geográfica (SIG) para identificar a las poblaciones potencialmente elegibles en áreas remotas, informar la planificación del programa de vacunación y rastrear los patrones de migración; la creación de flexibilidad en la programación y la dosificación de las vacunas, y la negociación con las partes en conflicto para garantizar el acceso seguro a las poblaciones elegibles para la vacunación.<sup>21</sup> Por ejemplo, los “días de tranquilidad” en El Salvador permitieron que la vacunación contra la polio continuara a pesar de los disturbios civiles y se les atribuyó el mérito de construir “un puente para la paz”.<sup>22</sup>

También es fundamental involucrar y escuchar a las comunidades mediante la comunicación y educación sobre los riesgos, la movilización de líderes sociales y religiosos de referencia y la

participación de los miembros de la comunidad, incluidas las poblaciones desplazadas, en las actividades de vacunación<sup>21,23</sup>. Un estudio de evaluación MEASURE destacó la importancia de un enfoque transfronterizo de los sistemas de salud para mejorar la atención del VIH y la tuberculosis entre las poblaciones móviles de África oriental, recomendando la vinculación regional y entre centros de salud de los registros de pacientes, y medidas para reducir las barreras de acceso a los servicios de salud entre las poblaciones móviles<sup>24</sup>. Como métodos potenciales para documentar y rastrear la inmunización durante el desplazamiento, se han propuesto inversiones para implementar y fortalecer las herramientas móviles de recolección de datos de salud, como la tarjeta de vacunación regional desarrollada para los venezolanos desplazados en América Latina, y el software del Sistema de Información de Salud Distrital II (DHIS2) utilizado por los sistemas nacionales de salud en muchos países de bajos ingresos.<sup>9</sup> Los modelos de atención al VIH también han demostrado el valor de las estrategias innovadoras, como la asistencia móvil y la prestación de servicios de entrega y distribución de medicamentos basados en la comunidad, incluso en los principales centros de tránsito y destinos de los migrantes.<sup>25</sup>

### *Una llamada a construir sistemas de salud más fuertes y justos*

Garantizar que las poblaciones más marginadas entre nosotros puedan acceder a las vacunas contra la COVID-19 no sólo es un imperativo moral, sino que es vital para la salud y el bienestar colectivos. Como comunidad global, tenemos la capacidad de aumentar el alcance de la vacuna entre las poblaciones desplazadas y de aprovechar las inversiones en el despliegue de la vacuna contra la COVID-19 para reforzar la infraestructura sanitaria para todos, al tiempo que incluimos de forma significativa a las comunidades desplazadas en el proceso. Mientras el mundo se enfrenta a uno de los retos de salud pública más importantes de la historia reciente, la forma en que respondamos hoy no sólo determinará el curso de esta pandemia, sino también quién se beneficiará de los avances de la salud pública en los próximos años. Podemos arraigar aún más las desigualdades y la desconfianza que sufren los refugiados y las poblaciones desplazadas de todo el mundo; o bien, reconociendo y afrontando estas desigualdades, podemos construir sistemas de salud más fuertes y justos que estén mejor preparados para responder a la COVID-19 y a futuras emergencias sanitarias.

## **Referencias**

1. ACNUR. <https://www.unhcr.org/refugee-statistics/> (consultado el 23 de febrero de 2021).
2. Fore, H. & Adhanom Ghebreyesus, T. In the COVID-19 vaccine race, we either win together or lose together (Organización Mundial de la Salud, 2021).
3. Phelan, A. L., Eccleston-Turner, M., Rourke, M., Maleche, A. & Wang, C. The Lancet 396, 800–802 (2020).
4. Berkley, S. COVAX explained. *Gavi* <https://www.gavi.org/vaccineswork/covax-explained> (2020).
5. Figueroa, J. P. et al. The Lancet 397, 562–564 (2021).

6. EIU. More than 85 poor countries will not have widespread access to coronavirus vaccines before 2023. *The Economist* (27 January 2021).
7. Berger, M. Dozens of countries have no plan to vaccinate refugees. That could leave everyone at risk. *Washington Post* (1 de febrero de 2021).
8. IFRC. *Least Protected, Most Affected: Migrants and refugees facing extraordinary risks during the COVID-19 pandemic* (2020).
9. Nair, S. Vaccine Authorization is Just the Beginning of the Journey to Protecting Displaced Populations from COVID-19. (Refugees International, 2020).
10. Rohan, H. & McKay, G. *Nat. Immunol.* 21, 591–594 (2020).
11. Nachega, J. B., Mbala-Kingebeni, P., Otshudiema, J., Zumla, A. & Tam-Fum, J.-J. M. *Lancet Glob. Health* 8, e991–e992 (2020).
12. The Global Fund. Global Fund Survey: Majority of HIV, TB and Malaria Programs Face Disruptions as a Result of COVID-19. (2020).
13. Lam, E., McCarthy, A. & Brennan, M. *Hum. Vaccines Immunother.* 11, 2627–2636 (2015).
14. Burchett, H. E. D. et al. *Vaccine* 32, 6505–6512 (2014).
15. Romero, S., Harmon, A., Tompkins, L. & Rio, G. M. N. del. Can't Get a Shot? Thousands of 'Vaccine Hunters' Are Crossing State Borders to Get Theirs. *The New York Times* (4 de febrero de 2021).
16. Human Rights Watch. Lebanon: Gaps Remain in Vaccine Program Planning. (2021).
17. Human Rights Watch. Syria: Covid-19 Vaccine Access Should Be Expanded, Fair. (2021).
18. Lieberman, A. Humanitarians plan for COVID-19 vaccinations in conflict zones. *Devex* (25 January 2021).
19. Parkin Daniels, J. Alarm at Colombia plan to exclude migrants from coronavirus vaccine. *The Guardian* (22 de diciembre de 2020).
20. Welsh, T. In Brief: Legal status for Venezuelans in Colombia to improve vaccine access. *Devex* (9 de febrero de 2021)
21. Nnadi, C. et al. *J. Infect. Dis.* 216, S368–S372 (2017).
22. de Quadros, C. *Sci. Am.* (2013).
23. Toppenberg-Pejcic, D. et al. *Health Commun.* 34, 437–455 (2019).

24. Edwards, J. K. et al. Mobility and Treatment Outcomes among People Living with HIV and/or Tuberculosis in East African Cross-Border Regions. (MEASURE Evaluation, 2020).
25. Camlin, C. S., Cassels, S. & Seeley, J. J. Int. AIDS Soc. 21, (2018).

### **Reconocimientos**

Agradecemos a Sarah Guyer y a Katherine McCann por su investigación y apoyo editorial.

### **Declaración de contribuciones de los autores:**

Todos los autores concibieron y conceptualizaron conjuntamente el comentario. M.Z. lideró el diseño y desarrollo del manuscrito. M.Z., L.S.L. Y M.N.A realizaron la investigación de fondo. M.Z. Y L.S.L. redactaron y revisaron el manuscrito. Todos los autores revisaron el manuscrito y aportaron varias rondas de comentarios críticos.

### **Declaración de intereses en conflicto:**

Certificamos que los autores no tienen ninguna afiliación o participación con organizaciones o entidades con interés financiero o no financiero en el tema tratado en este manuscrito.
